# Supplementary material for: Urban habitat complexity affects species richness but not environmental filtering of morphologically-diverse ants
Source: PeerJ. 2015 Oct 22;3:e1356. doi: 10.7717/peerj.1356 (PMC4627909; doi:10.7717/peerj.1356)
Supplement: Table S1 — Mean values (standard errors) for each habitat variable and microclimate in the three habitat complexity types: high-complexity parks (HCP), high-complexity remnants (HCR) and low-complexity parks (LCP). Linear mixed models were used to evaluate the effects of habitat type upon each habitat variable using “site” as random effect. Same letters indicate statistically similar values following pairwise comparisons performed using a sequential Bonferroni procedure (Holm, 1979) within the command “testInteractions()” of the R package phia. [file peerj-03-1356-s003.xlsx]

## Sheet: complexity-microclimate
	Vegetation	HCP	HCR	LCP	F(2,18)	p
	Understory volume 0-0.2 (%)	71.79 (9.88)	88.93 (3.34)	66.07 (11.35)	0.873	0.435
	Understory volume 0.2-0.5 (%)	65.00a (10.87)	74.29a (5.50)	2.14b (1.21)	32.94	< 0.001
	Understory volume 0.5-1 (%)	48.93a (8.25)	47.14a (6.23)	2.86b (1.49)	19.4	< 0.001
	Understory volume 1-2 (%)	49.29 a (5.16)	25.71b (5.53)	4.29c (1.67)	32.66	< 0.001
	Understory volume total (%)	58.75a (6.8)	59.02a (2.88)	18.84b (2.84)	28.11	< 0.001
	Tree stems (n)	12.60a (1.07)	18.60b (1.79)	10.70a (1.05)	7.47	< 0.01
	Tree height (m)	8.17a (0.69)	8.12a (0.66)	12.80b (0.72)	17.01	< 0.001
	Tree above ground biomass (t)	1.16a (0.27)	0.64a (0.15)	2.92b (0.53)	11.02	< 0.001
	Tree basal area (m2/ha)	28.75a (5.34)	24.62a (4.53)	46.44b (6.44)	5.16	< 0.05
	Litter	HCP	HCR	LCP	F(2,18)	p
	Litter mass (kg)	1.12a (0.11)	0.85b (0.05)	0.37c (0.06)	21.62	< 0.001
	Litter cover (%)	68.37a (6.84)	66.80a (8.67)	23.27b (6.14)	15.48	< 0.001
	Soil cover (%)	6.24 (2.03)	6.71 (2.71)	8.39 (2.67)	0.27	0.769
	Grass cover (%)	25.39a (6.77)	26.49a (6.83)	68.35b (7.55)	13.84	< 0.001
	Soil (0-10 cm)	HCP	HCR	LCP	F(2,18)	p
	Silt (%)	2.60a (0.28)	2.35a (0.23)	4.19b (0.27)	7.81	< 0.01
	Clay (%)	4.99a (0.24)	4.10a (0.28)	6.86b (0.45)	10.07	< 0.01
	Sand (%)	92.41a (0.45)	93.56a (0.46)	88.95b (0.61)	11.04	< 0.001
	Bulk density (g/cm3)	1.08 (0.04)	1.15 (0.03)	1.08 (0.04)	0.59	0.561
	Total porosity (%)	57.65 (1.81)	49.94 (1.72)	57.35 (1.67)	2.22	0.137
	Macro-aggregates (%)	72.34a (1.86)	79.10b (2.89)	61.50c (1.98)	11.5	< 0.001
	Micro-aggregates (%)	16.67 (2.73)	25.08 (1.74)	27.03 (1.79)	2.23	0.137
	Total carbon (%)	5.54 (0.75)	3.45 (0.25)	7.03 (0.91)	2.62	0.1
	Total nitrogen (%)	0.29 (0.04)	0.18 (0.01)	0.41 (0.05)	4.25	<0.05
	C:N	19.59a (0.40)	19.86a (0.42)	16.69b (0.40)	3.56	<0.05
	Microclimate	HCP	HCR	LCP	F(2,18)	p
	Average daily temperature (°C)	15.85a (0.16)	16.68b (0.12)	16.79b (0.20)	12.71	<0.001
	Nocturnal temperature (°C)	14.48 (0.34)	14.40 (0.08)	14.04 (0.11)	1.36	0.28
	Diurnal temperature (°C)	17.22a (0.44)	18.95b (0.23)	19.54b (0.35)	15.09	<0.001
	Winter soil moisture (%)	11.10 (1.01)	9.25 (0.75)	10.37 (1.72)	0.54	0.59
	Spring soil moisture (%)	6.94 (1.24)	6.47 (0.67)	8.83 (2.53)	0.62	0.55
	Summer soil moisture (%)	7.36 (1.44)	3.66 (0.43)	9.71 (3.06)	1.87	0.18
	Autumn soil moisture (%)	2.18 (0.50)	1.58 (0.63)	3.99 (1.27)	2.06	0.16
