# Supplementary material for: Urban habitat complexity affects species richness but not environmental filtering of morphologically-diverse ants
Source: PeerJ. 2015 Oct 22;3:e1356. doi: 10.7717/peerj.1356 (PMC4627909; doi:10.7717/peerj.1356)
Supplement: Table S3 — Correlation between habitat complexity variables (matrix R) and ant morphological traits (matrix Q) following the RLQ analysis. [file peerj-03-1356-s005.xlsx]

## Sheet: RLQ correlation traits-env
		Head width	Head length	Femur length	Pronotum width	BSI
	Understory volume total (%)	0.0744505	0.0817667	0.0499052	0.0994553	0.0634298
	N. stems	0.098095	0.121767	0.0859579	0.111005	0.0985103
	Tree height (m)	-0.102303	-0.121579	-0.0858773	-0.119104	-0.0982837
	Tree basal area (m2/ha)	-0.0844923	-0.0851	-0.0790223	-0.0920844	-0.0808449
	Tree above ground biomass (t)	-0.0984985	-0.111657	-0.0900541	-0.11033	-0.0962934
	Grass cover (%)	-0.0612145	-0.0594472	-0.0425871	-0.081298	-0.0479312
	Soil cover (%)	0.0278091	0.0351116	0.0165682	0.0243014	0.0214987
	Litter cover (%)	0.00914654	0.0169939	0.00770117	0.0302647	0.00421686
	Litter mass (kg)	-0.00179938	0.0140396	-0.00647144	0.0121616	-0.000504226
	Bulk density (g/cm3)	0.00387022	0.008673	0.000960847	0.00820252	0.00449859
	Macro-aggregates (%)	0.0947363	0.10071	0.0683306	0.105932	0.0806218
	Micro-aggregates (%)	-0.126427	-0.134644	-0.11551	-0.132829	-0.122164
	Total carbon (%)	-0.0277653	-0.0323023	-0.00596221	-0.0383056	-0.0182217
	Total nitrogen (%)	-0.0423959	-0.0502134	-0.0222364	-0.0574594	-0.0330135
	C:N	0.0546649	0.0653738	0.0532277	0.0735622	0.0515988
	Sand (%)	0.0271926	0.0302857	0.00563398	0.0425205	0.0166516
	Silt (%)	-0.0596693	-0.0605782	-0.0381958	-0.0774582	-0.0491943
	Clay (%)	-0.00359544	-0.00672335	0.00814559	-0.0147022	0.00238672
	Total porosity (%)	-0.0257159	-0.0254839	-0.0233657	-0.0318213	-0.0259884
